# Supplementary material for: Epidemiology of SARS-CoV-2 Infection in Italy Using Real-World Data: Methodology and Cohort Description of the Second Phase of Web-Based EPICOVID19 Study
Source: MDPI journal article supplement (doi:10.3390/ijerph19031274), 2022-01-24
Supplement: s1 [file s1]

## QUESTIONNAIRE EPICOID19 – PHASE 2

11. Do you have or have you had one or more of the following symptoms? If yes, indicate when (more choices are possible)\*

| Symptoms                                                                                                                                    | Yes | Before September 2020 | September 2020 | October 2020 | November 2020 | December 2020 | January 2021 |
|---------------------------------------------------------------------------------------------------------------------------------------------|-----|-----------------------|----------------|--------------|---------------|---------------|--------------|
| Fever with a temperature greater than 37.5 °C for at least one day                                                                          |     |                       |                |              |               |               |              |
| Cough                                                                                                                                       |     |                       |                |              |               |               |              |
| Sore throat/rhinorrhoea                                                                                                                     |     |                       |                |              |               |               |              |
| Headache                                                                                                                                    |     |                       |                |              |               |               |              |
| Myalgia                                                                                                                                     |     |                       |                |              |               |               |              |
| Taste disorder                                                                                                                              |     |                       |                |              |               |               |              |
| Olfactory disorder                                                                                                                          |     |                       |                |              |               |               |              |
| Difficulty breathing, shortness of breath due to light exertion (e.g. walking or climbing a few steps) and / or shortness of breath at rest |     |                       |                |              |               |               |              |
| Chest pain (sternum pain)                                                                                                                   |     |                       |                |              |               |               |              |
| Gastrointestinal disorders (diarrhoea, nausea, vomiting)                                                                                    |     |                       |                |              |               |               |              |
| Dermatological manifestations (rashes)                                                                                                      |     |                       |                |              |               |               |              |
| Loss of appetite                                                                                                                            |     |                       |                |              |               |               |              |
| Heart arrhythmia, palpitations, tachycardia, chest tightness                                                                                |     |                       |                |              |               |               |              |
| Other neurological disorders (dizziness, confusion, memory problems)                                                                        |     |                       |                |              |               |               |              |
| No symptoms                                                                                                                                 |     |                       |                |              |               |               |              |

## QUESTIONNAIRE EPICOID19 – PHASE 2

**12. If you have had symptoms attributable to a suspected or ascertained infection (swab and/or serological test), please indicate for each one whether:**

| Symptoms                                                                                                                                    | I have fully recovered | I partially recovered | I have not recovered at all |
|---------------------------------------------------------------------------------------------------------------------------------------------|------------------------|-----------------------|-----------------------------|
| Fever with a temperature greater than 37.5 °C for at least one day                                                                          |                        |                       |                             |
| Cough                                                                                                                                       |                        |                       |                             |
| Sore throat/rhinorrhoea                                                                                                                     |                        |                       |                             |
| Headache                                                                                                                                    |                        |                       |                             |
| Myalgia                                                                                                                                     |                        |                       |                             |
| Taste disorder                                                                                                                              |                        |                       |                             |
| Olfactory disorder                                                                                                                          |                        |                       |                             |
| Difficulty breathing, shortness of breath due to light exertion (e.g. walking or climbing a few steps) and / or shortness of breath at rest |                        |                       |                             |
| Chest pain (sternum pain)                                                                                                                   |                        |                       |                             |
| Gastrointestinal disorders (diarrhoea, nausea, vomiting)                                                                                    |                        |                       |                             |
| Dermatological manifestations (rashes)                                                                                                      |                        |                       |                             |
| Loss of appetite                                                                                                                            |                        |                       |                             |
| Heart arrhythmia, palpitations, tachycardia, chest tightness                                                                                |                        |                       |                             |
| Other neurological disorders (dizziness, confusion, memory problems)                                                                        |                        |                       |                             |

**13. Please indicate if you have or have been diagnosed with one or more of these diseases or disorders\***

| Diseases or ailments                                                                                                                                           | Before June 2020 | From June 2020 to date |
|----------------------------------------------------------------------------------------------------------------------------------------------------------------|------------------|------------------------|
| Lung diseases (e.g. asthma, obstructive pulmonary disease, metapneumonic fibrosis)                                                                             |                  |                        |
| Heart diseases (e.g. ischemic heart disease, atrial fibrillation, heart failure)                                                                               |                  |                        |
| Hypertension                                                                                                                                                   |                  |                        |
| Kidney diseases or dialysis                                                                                                                                    |                  |                        |
| Immune system diseases (e.g. celiac disease, Graves' disease, thyroid disease, psoriasis, rheumatoid arthritis, systemic lupus erythematosus, type I diabetes) |                  |                        |
| Tumours                                                                                                                                                        |                  |                        |
| Metabolic diseases (e.g. type II diabetes, obesity, gout)                                                                                                      |                  |                        |
| Neurological diseases( e.g. multiple sclerosis, epilepsy, neuropathies)                                                                                        |                  |                        |
| Cerebrovascular diseases (e.g. stroke, ischemia)                                                                                                               |                  |                        |
| Hepatitis B                                                                                                                                                    |                  |                        |
| Hepatitis C                                                                                                                                                    |                  |                        |

## QUESTIONNAIRE EPICOV19 – PHASE 2

|                                                                 |  |  |
|-----------------------------------------------------------------|--|--|
| Other liver diseases (e.g. liver cirrhosis, liver failure)      |  |  |
| Depression and/or anxiety                                       |  |  |
| Eating disorders (bulimia, anorexia, or other eating disorders) |  |  |
| Anaemia                                                         |  |  |
| No disease or disorder                                          |  |  |

**14. Please indicate if these conditions have occurred during your life\***

|                                                                                                  |  |
|--------------------------------------------------------------------------------------------------|--|
| <b>Other conditions</b>                                                                          |  |
| Not self-sufficient in carrying out daily activities (e.g. washing, dressing, shopping, cooking) |  |
| Allergies to pollens                                                                             |  |
| Food allergy                                                                                     |  |
| Recurrent herpes                                                                                 |  |
| Cytomegalovirus infection                                                                        |  |
| Papilloma virus infection                                                                        |  |
| None of these conditions                                                                         |  |

**15. Indicate if you regularly use these medications or supplements (not as a treatment for COVID-19):\***

- Oral or injection cortisones  
 Inhaled cortisones and/or bronchodilators  
 Antidepressants/anxiolytics/sedatives  
 Vitamin D (e.g. DIBASE)  
 Multivitamins

**16. Did you have the following vaccinations?\***

|                                         |  |
|-----------------------------------------|--|
| <b>Vaccinations</b>                     |  |
| Anti-flu in the winter season 2020/2021 |  |
| Anti-pneumococcal in the past 5 years   |  |
| Anti-zoster                             |  |
| Anti-meningococcal                      |  |
| Anti-tetanus in the past 10 years       |  |
| None of these vaccinations              |  |

**17. Did you get the COVID19 vaccination?\***

- No  
 Yes, only the first dose  
 Yes, both doses

*To be completed only if answer 17 is "Yes, only the first dose" or "Yes, both doses"*

**18. Indicate the date of the first vaccine dose?\***

/  /

*To be completed only if answer 17 is "No"*

**19. Thinking about the COVID-19 vaccine:**

- I will definitely get the vaccine  
 I will probably get the vaccine, but before that I will inform myself better

## QUESTIONNAIRE EPICOVID19 – PHASE 2

- I will probably not get the vaccine, but in any case I will inform myself better  
 I will not get the vaccine  
 I can't answer at this moment

\*\*\*\*\*

*To be completed only if of female sex*

### 20. Are you pregnant?\*

- No  Yes  I'm in menopause

### 21. Indicate the number of completed pregnancies\*

- 0  1  2 or more

### 22. Have you started taking contraceptives/birth pills from 1 June 2020 to date?\*

- No  
 Yes

### 23. Have you started taking hormone replacement therapy from 1 June 2020 to date?\*

- No  
 Yes

*To be completed only if of male sex*

### 24. Are you following or have you been following hormone therapy (e.g. anti-androgen)?\*

- Never  
 Yes, in the past, for less than 5 years  
 Yes, in the past, for more than 5 years  
 Yes currently, taking it less than 5 years  
 Yes currently, taking it more than 5 years

\*\*\*\*\*

### 25. Have you been in a close contact (direct contact at a distance of less than 2 meters, and lasting more than 15 minutes in a closed environment such as a house, workplace, waiting room, airplane, transportation vehicles) with confirmed COVID-19 cases, live or deceased?\*

- No, as far as I know, I have not been in a close contact  
 Yes, at least once without the mask  
 Yes, at least once but always with a mask

### 26. Have you ever been in fiduciary isolation (or quarantine) either self-imposed or established by the health authorities?\*

- Never  
 Yes, once  
 Yes, more than once

## NASOPHARYNGEAL SWAB FOR COVID-19

### 27. Since September 1, have you had at least one swab for COVID-19?\*

- No, I did not perform any test  
 Yes, at least once with a positive result

## QUESTIONNAIRE EPICOV19 – PHASE 2

Yes, always with a negative result

*If the answer is "Yes" to the last two answers:*

### 28. How many swab tests did you take?\*

- 1  
 2  
 3  
 4 or +

*To be completed only if answer 27 is "Yes, at least once with a positive result"*

**Considering the first swab with a positive result, indicate:**

29. Month in which it was performed\* |\_\_|\_\_|\_\_|\_\_|\_\_|

### 30. Type of swab test\*

- Molecular/PCR (outcome after at least 24 hours)  
 Rapid (results in less than one hour)  
 I do not know

### 31. Did you pay for the swab?\*

- No  Yes

### 32. Reason for swabbing (multiple choices are possible)\*

- I had developed suspicious symptoms  
 I have had close contact with a confirmed COVID-19 case (in the home, workplace, etc.)  
 For workplace control (e.g. healthcare workers)  
 Personal choice  
 Other reasons than those listed above

*To be completed only if you have had symptoms*

### 33. Number of days elapsed between the onset of symptoms and the swab test\*

- 1-2 days  
 3-7 days  
 8-14 days  
 More than 14 days

### 34. In the two weeks before the swab, did you attend one or more of these places? (multiple choices are possible)\*

- Schools  
 Bars, restaurants  
 Gyms, swimming pools, clubs, discotheques  
 Churches, oratories  
 Beauty center, hairdresser  
 Theatres, cinemas, museums  
 Parties, lunches, dinners at home  
 Public transport more than 3 times a week  
 Shared working spaces in less than two meters away with at least one other person

### 35. Did you ever go to the hospital after the infection?\*

- Never  
 Yes, but I was sent back and treated at home  
 Yes, I was hospitalized and underwent pharmacological treatments with or without oxygen in the ward with a simple mask or nasal glasses but without the need for a helmet / CPAP

## QUESTIONNAIRE EPICOV19 – PHASE 2

Yes, I was hospitalized and underwent pharmacological treatment with or without oxygen with non-invasive ventilation (e.g. helmet / CPAP)

Yes, I was hospitalized and underwent to pharmacological treatments and intubation

*To be completed only in case of hospitalization*

**36. How many days did the hospitalization last?\***    ||| days

**37. What treatments did you undergo for the treatment of COVID-19? (multiple choices are possible)\***

Low molecular weight heparin

Cortisones

Azithromycin

Other antibiotics

Antipyretics or pain relievers

Remdesevir

Lopinavir / ritonavir (Kaletra)

Cloroquina

Oxygen therapy

Other or do not know

None

**38. Did you have at least one control swab test?\***

Yes, and my last swab is positive ==> Please indicate the number of days between the first positive swab and the control test |  ||  |

Yes, and my last swab is negative ==> Please indicate the number of days between the first positive swab and the control test |  ||  |

No, I haven't done it ==> Has it been more than a month since the first positive swab to date?

|  | No |  | Yes

*To be completed only if answer 24 is "Yes, always with a negative result"*

**If you have always swabs with negative results, think about your last negative swab and indicate:**

**39. Month in which it was made\***    ||||||

**40. Type of swab test\***

Molecular /PCR (outcome after at least 24 hours)

Rapid (results in less than one hours)

I do not know

**41. Did you have to pay for the swab?\***

No     Yes

**42. Reason for swabbing (multiple choices are possible)\***

I had developed suspicious symptoms

I have had close contact with a confirmed COVID-19 case (at home, workplace, etc.)

For workplace control (e.g. health care workers)

Personal choice

Other reasons than those listed above

TO BE COMPLETED ONLY IF HAS SYMPTOMS

**43. Number of days elapsed between the onset of symptoms and the swab test\***

1-2 days

3-7 days

8-14 days

## QUESTIONNAIRE EPICOV19 – PHASE 2

More than 14 days

**44. In the two weeks before the swab, did you attend one or more of these places? (multiple choices are possible)\***

- Schools
- Bars, restaurants
- Gyms, swimming pools, clubs, discotheques
- Churches, oratories
- Beauty center, hairdresser
- Theatres, cinemas, museums
- Parties, lunches, dinners at home
- Public transport more than 3 times a week
- Shared working spaces in less than two meters away with at least one other person

### **SEROLOGICAL TEST FOR COVID-19**

**45. Since September 1<sup>st</sup>, have you done at least one serological test (blood drop or blood sample) for COVID-19?\***

- No, I did not perform any test
- Yes, at least once with a positive result
- Yes, always with a negative result

*To be completed only if the answer is "Yes, at least once with a positive result"*

**46. Thinking about the first (or the only) positive serological test, indicate the month in which it was performed\* |\_\_||\_\_||\_\_||\_\_||\_\_||\_\_|**

**47. Type of test\***  Lancing device  Blood sample

**48. Reason for doing the serological test (multiple choices are possible)\***

- For workplace control (e.g. healthcare workers)
- Personal choice
- Other reasons than those listed above

**49. After the first positive serological test, have you ever had a negative serological test?\***

- No, I've never done any other serological tests
- No, my last serological test is still positive => Last month positive test | \_\_ || \_\_ || \_\_ || \_\_ |
- Yes => Month of first negative test | \_\_ || \_\_ || \_\_ || \_\_ |

*To be completed only if the answer is "Yes, always with a negative result"*

**50. Thinking about the last negative serological test, indicate the month in which it was performed\* |\_\_||\_\_||\_\_||\_\_||\_\_||\_\_|**

**51. Type of test\***  Lancing device  Blood sample

**52. Reason for doing the serological test (multiple choices are possible)\***

- For workplace control (e.g. healthcare workers)
- Personal choice
- Other reasons than those listed above



## QUESTIONNAIRE EPICOV19 – PHASE 2

### PERSONAL CHARACTERISTICS AND HEALTH STATUS

**53. How would you describe your health in general?\***

Very bad  Bad  Adequate  Good  Very good

**54. After the COVID-19 pandemic situation:\***

|                                                                                   | No | A little bit | Neutral | Enough | Yes |
|-----------------------------------------------------------------------------------|----|--------------|---------|--------|-----|
| Are you afraid of being infected with COVID-19?                                   |    |              |         |        |     |
| Are you afraid that your family members might be infected?                        |    |              |         |        |     |
| Are you worried about your economic and working conditions?                       |    |              |         |        |     |
| Are you worried about the economic and working conditions of your family members? |    |              |         |        |     |

**55. How many days in the past 30 days did you:\***

|                                                                                                             | 0 | 1 | 2 | 3 | 4 | 5 |
|-------------------------------------------------------------------------------------------------------------|---|---|---|---|---|---|
| Have trouble falling asleep?                                                                                |   |   |   |   |   |   |
| Wake up several times per night but did not have trouble falling asleep again?                              |   |   |   |   |   |   |
| Wake up one or more times per night (including waking far too early) and have trouble falling asleep again? |   |   |   |   |   |   |
| Wake up after your usual amount of sleep feeling tired or exhausted?                                        |   |   |   |   |   |   |

0 = Not at all    1 = 1-3 days    2 = 4-7 days    3 = 8-14 days    4 = 15-21 days    5 = 22-30 days

**56. Thinking about the last month, how often:\***

|                                                                                     | 0 | 1 | 2 | 3 | 4 |
|-------------------------------------------------------------------------------------|---|---|---|---|---|
| Have you been upset because of something that happened unexpectedly?                |   |   |   |   |   |
| Have you felt that you were unable to control the important things in your life?    |   |   |   |   |   |
| Have you felt nervous and "stressed"?                                               |   |   |   |   |   |
| Have you felt confident about your ability to handle your personal problems?        |   |   |   |   |   |
| Have you felt that things were going your way?                                      |   |   |   |   |   |
| Have you found that you could not cope with all the things that you had to do?      |   |   |   |   |   |
| Have you been able to control irritations in your life?                             |   |   |   |   |   |
| Have you felt that you were on top of things?                                       |   |   |   |   |   |
| Have you been angered because of things that were outside of your control?          |   |   |   |   |   |
| Have you felt difficulties were piling up so high that you could not overcome them? |   |   |   |   |   |
| Have you trusted yourself?                                                          |   |   |   |   |   |
| Have you trusted others?                                                            |   |   |   |   |   |
| Have you felt you can protect your loved ones?                                      |   |   |   |   |   |
| Have you felt you can help improve the situation?                                   |   |   |   |   |   |
| Have you felt helpless?                                                             |   |   |   |   |   |

0 = Never    1 = Almost never    2 = Sometimes    3 = Fairly often    4 = Very often

# QUESTIONNAIRE EPICOV19 – PHASE 2

## LIFESTYLES AND BEHAVIORS

### 57. Do you smoke cigarettes (including electronic cigarettes)?\*

- I don't smoke, or have smoked less than 100 cigarettes in my lifetime, and I don't currently smoke
- I am a former-smoker (I have smoked at least 100 cigarettes in my lifetime, but I do not smoke anymore)
- Yes, smoking less than 10 cigarettes per day
- Yes, smoking between 10 and 20 cigarettes per day
- Yes, smoking more than 20 cigarettes a day (more than one pack a day)

*To be completed only if former smoker*

### 58. At what age did you quit smoking?\* \_\_\_\_\_ years

### 59. At what age did you start smoking?\* \_\_\_\_\_ years

### 60. How many cigarettes a day did you smoke before quitting?\*

- I smoked less than 10 cigarettes a day
- I smoked between 10 and 20 cigarettes a day
- I smoked more than 20 cigarettes a day (more than one pack a day)

### 61. Why did you quit smoking?\*

- Health problems
- Doctor's advice
- Personal choice
- Illness of relatives or friends

*To be completed only if current smoker*

### 62. At what age did you start smoking?\* \_\_\_\_\_ years

### 63. Have you ever smoked or are you currently smoking electronic cigarettes?\*

- No
- Yes, exclusively electronic cigarettes
- Yes, not exclusively electronic cigarettes (including tobacco cigarettes)

### 64. Does someone usually smoke in your presence in closed environments (at home, in the car, etc.)?\*

- No
- Yes, one person
- Yes, more than one person

### 65. Thinking about the last year, if you have consumed alcohol with meals or between meals, please indicate the frequency\*

- I don't drink alcohol
- Once a month
- 2-4 times a month
- 2-3 times a week
- 4-5 times a week
- 6 or more times a week

### 66. Since the pandemic started (from February 2020), please indicate if (and how) the following habits or conditions have changed\*

|                               | Not present or not applicable | Decreased | Unchanged | Increased |
|-------------------------------|-------------------------------|-----------|-----------|-----------|
| Snacking habits between meals |                               |           |           |           |

## QUESTIONNAIRE EPICOV19 – PHASE 2

|                                                                                                                                                                                                        |  |  |  |  |
|--------------------------------------------------------------------------------------------------------------------------------------------------------------------------------------------------------|--|--|--|--|
| Skip one of the main meals                                                                                                                                                                             |  |  |  |  |
| Daily consumption of fruit and vegetables                                                                                                                                                              |  |  |  |  |
| Eating a balanced diet (including healthy ingredients such as whole grains, legumes, eggs, nuts, fruits and vegetables)                                                                                |  |  |  |  |
| Consumption of sugary foods, drinks, ice cream, sweets, candies                                                                                                                                        |  |  |  |  |
| Consumption of fried food/fast food                                                                                                                                                                    |  |  |  |  |
| Daily/weekly alcohol consumption (during and/or away from meals)                                                                                                                                       |  |  |  |  |
| Physical activity involving an increase in heart rate and breathing (brisk walking, cycling, swimming, running)                                                                                        |  |  |  |  |
| Time spent sitting and in front of the screen (TV, computer, mobile phone)                                                                                                                             |  |  |  |  |
| Hours of sleep                                                                                                                                                                                         |  |  |  |  |
| Access to the National Health Service (SSN) for visits and examinations for minor health problems (preventive visits or checks)                                                                        |  |  |  |  |
| Access to the National Health Service (SSN) for visits and examinations for major health problems (oncologic, major surgeries, withdrawing of chronic life-sustaining treatments, heart failure, BPCO) |  |  |  |  |
| Contact with the general practitioner                                                                                                                                                                  |  |  |  |  |

### HOUSING CONDITIONS

**67. What type of heating do you mainly use in your home?\***

- None  
 Radiator  
 Panels (floor, walls)  
 Fan-coil/split/heat pump/fan coil units  
 Gas stove  
 Electric stove  
 Kerosene stove  
 Pellet stove  
 Fireplace/stove or wood boiler

**68. How many rooms are there in your home (excluding the bathroom and auxiliary spaces)?\***

- One  Two  Three  More than three

**69. Besides you, how many people live in your household?\***

- None  One  Two  More than two

**70. Are there minors (<18 years old) among your cohabitants?\***

- No  
 Yes, one  
 Yes, two  
 Yes, three or more

**71. The house you currently live in is \***

- Owned  Rented  Owned by relatives  Other (social housing, cooperative housing)

**72. How many cars does your household own?\***

- 0  1  2  3 or more

## QUESTIONNAIRE EPICOVID19 – PHASE 2

### SOURCES OF INFORMATION ON COVID-19

**73. Do you feel sufficiently informed about the risks of COVID-19?**

No  Yes

**74. What sources of information have you consulted / listened about the risks of COVID-19 and how reliable do you consider them?**

| Information source                                                                     | No | Yes, and I don't trust it | Yes, and I partially trust it | Yes, and I trust it |
|----------------------------------------------------------------------------------------|----|---------------------------|-------------------------------|---------------------|
| Television (national and/or local)                                                     |    |                           |                               |                     |
| Newspapers and magazines                                                               |    |                           |                               |                     |
| Radio (national and/or local)                                                          |    |                           |                               |                     |
| Government, Ministries, Departments, Civil Protection, Law Enforcement, European Union |    |                           |                               |                     |
| Newspaper, TV or radio websites                                                        |    |                           |                               |                     |
| Scientists, researchers, academics                                                     |    |                           |                               |                     |
| Scientific publications online                                                         |    |                           |                               |                     |
| Associations or trade unions (environmentalists, volunteers)                           |    |                           |                               |                     |
| Religious institutions                                                                 |    |                           |                               |                     |
| Search engines (Google)                                                                |    |                           |                               |                     |
| Social media channels (Facebook, Twitter, Instagram, WhatsApp)                         |    |                           |                               |                     |

**75. Below are listed some problems you may encounter in everyday life. What do you think is risky? Is it low, medium or high risk?**

| Problems                                      | Low | Medium | High | I do not know |
|-----------------------------------------------|-----|--------|------|---------------|
| Natural disasters (earthquakes, floods, etc.) |     |        |      |               |
| Unemployment                                  |     |        |      |               |
| Pollution of the environment                  |     |        |      |               |
| Epidemics                                     |     |        |      |               |
| Poverty                                       |     |        |      |               |
| Terrorism                                     |     |        |      |               |
| Climate changes                               |     |        |      |               |
| Crime                                         |     |        |      |               |
| Contaminated food                             |     |        |      |               |

**Any additional information, reports and comments**

---



---



---

## QUESTIONNAIRE EPICOVID19 – PHASE 2

### EXPRESSION OF INTEREST

Do you agree to be contacted to participate in an Italian study promoted by the National Research Council, which provides for free swabs and the collection of a biological sample (saliva/a few drops of blood)? Among those who join, a random sample will be selected to participate in the national study.

- No  
 Yes

Do you accept to be contacted for future phases of the EPICOVID19 study?

- No  
 Yes

If you agree, please let us know if you want to be contacted at another e-mail address other than the one we already used to contact you back

@\_\_\_\_\_

and / or a telephone number

\_\_\_\_\_

To receive information about the project, you can contact the research team at this email address [epicovid19@itb.cnr.it](mailto:epicovid19@itb.cnr.it) or follow the updates on our website <https://epicovid19.itb.cnr.it/>
