# Supplementary material for: Epidemiology of SARS-CoV-2 Infection in Italy Using Real-World Data: Methodology and Cohort Description of the Second Phase of Web-Based EPICOVID19 Study
Source: MDPI journal article supplement (doi:10.3390/ijerph19031274), 2022-01-24
Supplement: s1 [file s1]

## Membership of the EPICOV19 Working Group.

|                            |            |                                 |                                                                                                                                                                              |
|----------------------------|------------|---------------------------------|------------------------------------------------------------------------------------------------------------------------------------------------------------------------------|
| Fulvio Adorni              | MPH        | fulvio.adorni@itb.cnr.it        | National Research Council, Institute of Biomedical Technologies, Via Fratelli Cervi 93, 20054 Segrate (MI), Italy                                                            |
| Massimo Andreoni           | MD         | andreoni@uniroma2.it            | Infectious Diseases Clinic, Department of System Medicine, Tor Vergata University of Rome, 00133 Rome, Italy                                                                 |
| Raffaele Antonelli Incalzi | MD         | r.antonelli@unicampus.it        | Unit of Geriatrics, Department of Medicine, Biomedical Campus of Rome, via Alvaro del Portillo, 21, 00128 Rome, Italy                                                        |
| Luca Bastiani              | PhD        | luca.bastiani@ifc.cnr.it        | National Research Council, Institute of Clinical Physiology, Via G. Moruzzi 1, 56124 Pisa (PI), Italy                                                                        |
| Fabrizio Bianchi           | PhD        | fabrieppi@ifc.cnr.it            | National Research Council, Institute of Clinical Physiology, Via G. Moruzzi 1, 56124 Pisa (PI), Italy                                                                        |
| Di Bari Mauro              | MD         | mauro.dibari@unifi.it           | Geriatric Intensive Care Medicine, University of Florence and Azienda Ospedaliero-Universitaria Careggi, Largo Brambilla, 3 - 50134 Firenze, Italy                           |
| Loredana Fortunato         | MSc        | loredana.fortunato@ifc.cnr.it   | National Research Council, Institute of Clinical Physiology, Via G. Moruzzi 1, 56124 Pisa (PI), Italy                                                                        |
| Massimo Galli              | MD         | massimo.galli@unimi.it          | Infectious Diseases Unit, Department of Biomedical and Clinical Sciences L.Sacco, Università di Milano, ASST Fatebenefratelli Sacco, Via G.B. Grassi 74, 20157 Milano, Italy |
| Andrea Giacomelli          | MD         | andrea.giacomelli@unimi.it      | Infectious Diseases Unit, Department of Biomedical and Clinical Sciences L.Sacco, Università di Milano, ASST Fatebenefratelli Sacco, Via G.B. Grassi 74, 20157 Milano, Italy |
| Nithiya Jesuthasan         | MPH        | nithiya.jesuthasan@itb.cnr.it   | National Research Council, Institute of Biomedical Technologies, Via Fratelli Cervi 93, 20054 Segrate (MI), Italy                                                            |
| Stefania Maggi             | MD;<br>PhD | stefania.maggi@in.cnr.it        | National Research Council, Institute of Neuroscience, Aging Branch, Via Vincenzo Maria Gallucci 16, 35128 Padova                                                             |
| Claudio Maria Mastroianni  | MD         | claudio.mastroianni@uniroma1.it | Department of Public Health and Infectious Disease, "Sapienza" University, Piazzale Aldo Moro 5, 00185 Roma, Italy.                                                          |

|                   |            |                                          |                                                                                                                                                                                                                                      |
|-------------------|------------|------------------------------------------|--------------------------------------------------------------------------------------------------------------------------------------------------------------------------------------------------------------------------------------|
| Sabrina Molinaro  | PhD        | sabrina.molinaro@ifc.cnr.it              | National Research Council, Institute of Clinical Physiology,<br>Via G. Moruzzi 1, 56124 Pisa (PI), Italy                                                                                                                             |
| Marianna Noale    | MSc        | marianna.noale@in.cnr.it                 | National Research Council, Institute of Neuroscience, Aging<br>Branch, Via Vincenzo Maria Gallucci 16, 35128 Padova                                                                                                                  |
| Gabriele Pagani   | MD         | gabriele.pagani@asst-ovestmi.it          | Infectious Diseases Unit, Legnano General Hospital, ASST<br>Ovest Milanese, 20025 Legnano (MI), Italy and DIBIC "Luigi<br>Sacco", University of Milan, 20157 Milan, Italy                                                            |
| Claudio Pedone    | MD         | claudio.pedone@gmail.com                 | Unit of Geriatrics, Department of Medicine, Biomedical<br>Campus of Rome, Via Álvaro del Portillo 21, 00128 Roma,<br>Italy                                                                                                           |
| Carla Pettenati   | MD         | cpettenati@me.com                        | National Research Council, Institute of Biomedical<br>Technologies, Via Fratelli Cervi 93, 20054 Segrate (MI), Italy                                                                                                                 |
| Federica Prinelli | PhD        | federica.prinelli@itb.cnr.it             | National Research Council, Institute of Biomedical<br>Technologies, Via Fratelli Cervi 93, 20054 Segrate (MI), Italy                                                                                                                 |
| Stefano Rusconi   | MD         | stefano.rusconi@unimi.it                 | Infectious Diseases Unit, Legnano General Hospital, ASST<br>Ovest Milanese, 20025 Legnano (MI), Italy and DIBIC "Luigi<br>Sacco", University of Milan, 20157 Milan, Italy                                                            |
| Aleksandra Sojic  | PhD        | aleksandra.sojic@itb.cnr.it              | National Research Council, Institute of Biomedical<br>Technologies, Via Fratelli Cervi 93, 20054 Segrate (MI), Italy                                                                                                                 |
| Marcello Tavio    | MD         | marcello.tavio@ospedaliriuniti.marche.it | Division of Infectious Diseases, Azienda Ospedaliero<br>Universitaria Ospedali Riuniti, Via Conca, 71 - 60126 Torrette<br>- Ancona, Italy                                                                                            |
| Caterina Trevisan | MD,<br>PhD | caterina.trevisan.5@studenti.unipd.it    | University of Padova, Department of Medicine (DIMED) –<br>Geriatric Unit, Via Giustiniani 2, 35128 Padova (PD), Italy<br>and Department of Medical Sciences, University of Ferrara,<br>via Aldo Moro 8, 44124, Cona - Ferrara, Italy |
