# Supplementary material for: Epidemiology of SARS-CoV-2 Infection in Italy Using Real-World Data: Methodology and Cohort Description of the Second Phase of Web-Based EPICOVID19 Study
Source: MDPI journal article supplement (doi:10.3390/ijerph19031274), 2022-01-24
Supplement: s1 [file s1]

**Table S1.** Contents of the web-based questionnaires.

| Questionnaires' sections                                | EPICOV19<br>phase I | EPICOV19<br>phase II |
|---------------------------------------------------------|---------------------|----------------------|
| <i>Socio-demographic characteristics</i>                |                     |                      |
| Date of birth                                           | ✓                   |                      |
| Sex                                                     | ✓                   | ✓                    |
| Country and province of residency                       | ✓                   | ✓                    |
| Ethnicity                                               | ✓                   |                      |
| Educational attainment                                  | ✓                   |                      |
| Occupational level                                      | ✓                   | ✓                    |
| Employment status                                       | ✓                   | ✓                    |
| <i>Clinical features and COVID-19 related variables</i> |                     |                      |
| Weight                                                  |                     | ✓                    |
| Height                                                  |                     | ✓                    |
| Blood type                                              |                     | ✓                    |
| COVID-19-like symptoms                                  | ✓                   | ✓                    |
| Presence of chronic diseases or conditions              | ✓                   | ✓                    |
| Use of drugs or supplement                              | ✓                   | ✓                    |
| Vaccines                                                | ✓                   | ✓                    |
| COVID-19 vaccine                                        |                     | ✓                    |
| Use of birth pills and/or hormone replacement therapy   | ✓                   | ✓                    |
| Currently and past pregnancy                            | ✓                   | ✓                    |
| Anti-androgens hormone therapy                          |                     | ✓                    |
| Contacts with COVID-19 cases                            | ✓                   | ✓                    |
| Fiduciary isolation (or quarantine)                     |                     | ✓                    |
| COVID-19 nasopharyngeal swab testing                    | ✓                   | ✓                    |
| Date of COVID-19 nasopharyngeal swab testing            |                     | ✓                    |
| Type of COVID-19 nasopharyngeal swab testing            |                     | ✓                    |
| Reasons for COVID-19 nasopharyngeal swab testing        |                     | ✓                    |
| Time from symptoms                                      |                     | ✓                    |
| COVID-19 serological testing                            |                     | ✓                    |
| Date of COVID-19 serological testing                    |                     | ✓                    |
| Type of COVID-19 serological testing                    |                     | ✓                    |
| Reasons for COVID-19 serological testing                |                     | ✓                    |
| Contact with emergency number                           | ✓                   | ✓                    |
| Hospitalization for COVID-19                            | ✓                   | ✓                    |
| <i>Personal characteristics and behaviours</i>          |                     |                      |
| Self-reported health status                             | ✓                   | ✓                    |
| Fear of SARS-CoV-2 <sup>^</sup> infection               | ✓                   | ✓                    |
| Sleep disorders                                         |                     | ✓                    |
| Anxiety and stress perceived                            |                     | ✓                    |
| Change of behaviours during the confinement             |                     | ✓                    |
| Population density in the area of residence             | ✓                   |                      |
| Traffic intensity                                       | ✓                   |                      |
| Number of co-habitants                                  | ✓                   | ✓                    |
| Number of rooms                                         | ✓                   | ✓                    |
| Home heating system                                     |                     | ✓                    |

|                                                  |   |   |
|--------------------------------------------------|---|---|
| Presence of at-risk co-habitants                 | ✓ |   |
| Presence of co-habitants aged less than 18 years |   | ✓ |
| Daily mean number of contacts                    | ✓ |   |
| Smoking habit                                    | ✓ | ✓ |
| Alcoholic beverages                              |   | ✓ |
| Physical activity                                | ✓ |   |
| Job condition                                    | ✓ |   |
| Going out weekly                                 | ✓ |   |
| Use of public transportation                     | ✓ |   |
| House property                                   |   | ✓ |
| Cars property                                    |   | ✓ |
| Number of cars                                   |   | ✓ |
| COVID-19 sources of information                  |   | ✓ |
| Risk perceived                                   |   | ✓ |

---

^SARS-CoV-2: severe acute respiratory syndrome coronavirus 2.

**Table S2.** Validated scales and questionnaires used in EPICOV19 survey

| Validated scales and questionnaires | Measures                                                                                                                                                                                                                                                                                                                                                                                                                                                                                                                                                                                                                                                                                                                                                                                                                                                                                                                                                                                             |
|-------------------------------------|------------------------------------------------------------------------------------------------------------------------------------------------------------------------------------------------------------------------------------------------------------------------------------------------------------------------------------------------------------------------------------------------------------------------------------------------------------------------------------------------------------------------------------------------------------------------------------------------------------------------------------------------------------------------------------------------------------------------------------------------------------------------------------------------------------------------------------------------------------------------------------------------------------------------------------------------------------------------------------------------------|
| Educational attainment              | <a href="http://uis.unesco.org/sites/default/files/documents/international-standard-classification-of-education-iscd-2011-en.pdf">http://uis.unesco.org/sites/default/files/documents/international-standard-classification-of-education-iscd-2011-en.pdf</a>                                                                                                                                                                                                                                                                                                                                                                                                                                                                                                                                                                                                                                                                                                                                        |
| Occupational status                 | <a href="https://www.eurofound.europa.eu/surveys/ewcs/2005/classification">https://www.eurofound.europa.eu/surveys/ewcs/2005/classification</a>                                                                                                                                                                                                                                                                                                                                                                                                                                                                                                                                                                                                                                                                                                                                                                                                                                                      |
| Self-perceived health status        | <a href="https://ec.europa.eu/eurostat/statistics-explained/index.php?title=Glossary:Self-perceived_health">https://ec.europa.eu/eurostat/statistics-explained/index.php?title=Glossary:Self-perceived_health</a>                                                                                                                                                                                                                                                                                                                                                                                                                                                                                                                                                                                                                                                                                                                                                                                    |
| Risk perception                     | Kim, J.S.; et al. Middle East respiratory syndrome-related knowledge, preventive behaviours and risk perception among nursing students during outbreak. J Clin Nurs. 2016 Sep;25(17-18):2542-9.                                                                                                                                                                                                                                                                                                                                                                                                                                                                                                                                                                                                                                                                                                                                                                                                      |
| Clinical features                   | World Health Organization & International Severe Acute Respiratory and emerging Infection Consortium. (2020). Global COVID-19 Clinical Platform Novel Coronavirus (COVID-19)- Rapid Version, “ <a href="https://www.who.int/docs/default-source/coronaviruse/who-ncov-crf.pdf?sfvrsn=84766e69_2,">https://www.who.int/docs/default-source/coronaviruse/who-ncov-crf.pdf?sfvrsn=84766e69_2,</a> ” [Online].<br>Case Record Form Instructions Severe Acute Respiratory Infection Clinical Characterization Data Tool, “ <a href="https://media.tghn.org/medialibrary/2019/06/SPRINT-SARI_CRF.V2_Dec_2017__Complete.pdf">https://media.tghn.org/medialibrary/2019/06/SPRINT-SARI_CRF.V2_Dec_2017__Complete.pdf,</a> ” [Online].<br>M. E. R. S. C. (MERS-CoV), “ <a href="https://www.who.int/csr/disease/coronavirus_infections/MERS_case_investigation_questionnaire.pdf?ua=1,">https://www.who.int/csr/disease/coronavirus_infections/MERS_case_investigation_questionnaire.pdf?ua=1,</a> ” [Online]. |
| Self-reported traffic intensity     | Cesaroni, G.; Badaloni, C.; Porta, D.; Forastiere, F.; et al. Comparison between various indices of exposure to traffic-related air pollution and their impact on respiratory health in adults. Occup Environ Med. 2008 Oct;65(10):683-90.                                                                                                                                                                                                                                                                                                                                                                                                                                                                                                                                                                                                                                                                                                                                                           |
| Physical activity                   | Centers for Disease Control and Prevention, “Strategies to Prevent Obesity and Other Chronic Diseases: The CDC Guide to Strategies to Increase Physical Activity in the Community. Atlanta: U.S. Department of Health and Human Services; 2011.                                                                                                                                                                                                                                                                                                                                                                                                                                                                                                                                                                                                                                                                                                                                                      |
| Sleeping disorders                  | Jenkins, C.D.; Stanton, B.A.; Niemcryk, S.J.; Rose, R.M. A scale for the estimation of sleep problems in clinical research. J Clin Epidemiol 1988;41(4):313-21                                                                                                                                                                                                                                                                                                                                                                                                                                                                                                                                                                                                                                                                                                                                                                                                                                       |
| Smoking habit                       | National Health Interview Survey – Adult tobacco use information. Centers for Disease Prevention and Control. 2017 Aug 29 <a href="https://www.cdc.gov/nchs/nhis/tobacco/tobacco_glossary.htm">https://www.cdc.gov/nchs/nhis/tobacco/tobacco_glossary.htm</a>                                                                                                                                                                                                                                                                                                                                                                                                                                                                                                                                                                                                                                                                                                                                        |
| Perceived stress                    | Cohen, S.; Kamarck, T.; and Mermelstein, R. A global measure of perceived stress. Journal of Health and Social Behavior. 1983, 24, 386-396 (adapted)                                                                                                                                                                                                                                                                                                                                                                                                                                                                                                                                                                                                                                                                                                                                                                                                                                                 |
| Alcohol consumption                 | Frank, D.; De Benedetti, A.F.; Volk, R.J.; Williams, E.C.; Kivlahan, D.R.; Bradley, K.A. Effectiveness of the AUDIT-C as a screening test for alcohol misuse in three race/ethnic groups. J Gen Intern Med. 2008, 23(6):781-787 (adapted)                                                                                                                                                                                                                                                                                                                                                                                                                                                                                                                                                                                                                                                                                                                                                            |
| Deprivation index                   | Townsend, P.; Phillimore, P.; Beattie, A. (1988) Health and Deprivation: Inequality and the North Croom Helm: London                                                                                                                                                                                                                                                                                                                                                                                                                                                                                                                                                                                                                                                                                                                                                                                                                                                                                 |



**Table S3.** Characteristics of individuals who participated in phase II survey ( $n=41,473$ ) and of those who did not ( $n=157,349$ )

|                              |                          | Phase II survey                |                                        | <i>p-value</i> |
|------------------------------|--------------------------|--------------------------------|----------------------------------------|----------------|
|                              |                          | Participated<br>( $n=41,473$ ) | Did not participate<br>( $n=157,349$ ) |                |
| Sex                          | Females                  | 25,146 (60.6)                  | 93,524 (59.4)                          | <0.001         |
|                              | Males                    | 16,327 (39.4)                  | 63,825 (40.6)                          |                |
| Class of age                 | 18-29                    | 3,255 (7.8)                    | 21,564 (13.7)                          | <0.001         |
|                              | 30-39                    | 7,336 (17.7)                   | 30,427 (19.3)                          |                |
|                              | 40-49                    | 9,274 (22.4)                   | 33,468 (21.3)                          |                |
|                              | 50-59                    | 10,616 (25.6)                  | 35,415 (22.5)                          |                |
|                              | 60-69                    | 8,217 (19.8)                   | 25,416 (16.2)                          |                |
|                              | 70-79                    | 2,523 (6.1)                    | 9,083 (5.8)                            |                |
|                              | 80+                      | 252 (0.6)                      | 1,976 (1.3)                            |                |
| Italian area                 | Northern                 | 29,072 (70.1)                  | 104,605 (66.5)                         | <0.001         |
|                              | Central                  | 8,282 (20.0)                   | 32,600 (20.7)                          |                |
|                              | Southern and islands     | 4,096 (9.9)                    | 19,754 (12.6)                          |                |
|                              | Abroad or unknown        | 23 (0.1)                       | 390 (0.2)                              |                |
| Educational level            | Low                      | 1,381 (3.3)                    | 10,473 (6.7)                           | <0.001         |
|                              | Middle                   | 12,934 (31.2)                  | 55,866 (35.5)                          |                |
|                              | High                     | 27,158 (65.5)                  | 91,010 (57.8)                          |                |
| Education                    | None                     | 19 (0.0)                       | 253 (0.2)                              | <0.001         |
|                              | Elementary school        | 36 (0.1)                       | 987 (0.6)                              |                |
|                              | Secondary school license | 1,326 (3.2)                    | 9,233 (5.9)                            |                |
|                              | Secondary school diploma | 12,934 (31.2)                  | 55,866 (35.5)                          |                |
|                              | University degree        | 18,263 (44.0)                  | 63,666 (40.5)                          |                |
|                              | Postgraduate degree      | 8,895 (21.4)                   | 27,344 (17.4)                          |                |
| Employment status            | Employed                 | 29,299 (70.6)                  | 107,557 (68.4)                         | <0.001         |
|                              | Student                  | 1,703 (4.1)                    | 11,733 (7.5)                           |                |
|                              | Unemployed               | 1,671 (4.0)                    | 7,513 (4.8)                            |                |
|                              | Retired                  | 6,611 (15.9)                   | 21,697 (13.8)                          |                |
|                              | Other                    | 2,189 (5.3)                    | 8,849 (5.6)                            |                |
| Healthcare workers           | No                       | 38,179 (92.1)                  | 145,907 (92.7)                         | <0.001         |
|                              | Yes                      | 3,294 (7.9)                    | 11,442 (7.3)                           |                |
| N° of morbidities            | None                     | 25,466 (61.4)                  | 101,791 (64.7)                         | <0.001         |
|                              | One                      | 11,628 (28.0)                  | 40,736 (25.9)                          |                |
|                              | Two                      | 3,356 (8.1)                    | 11,181 (7.1)                           |                |
|                              | Three or more            | 1,023 (2.5)                    | 3,641 (2.3)                            |                |
| Number of rooms in the house | One                      | 414 (1.0)                      | 1,752 (1.1)                            | 0.049          |
|                              | Two                      | 3,998 (9.6)                    | 15,583 (9.9)                           |                |
|                              | Three                    | 10,596 (25.5)                  | 40,403 (25.7)                          |                |
|                              | More than three          | 26,465 (63.8)                  | 99,611 (63.3)                          |                |
| Number of cohabitant people  | No one                   | 5,713 (13.8)                   | 19,383 (12.3)                          | <0.001         |
|                              | One                      | 13,819 (33.3)                  | 49,205 (31.3)                          |                |
|                              | Two                      | 9,611 (23.2)                   | 37,699 (24.0)                          |                |
|                              | More than two            | 12,330 (29.7)                  | 51,062 (32.5)                          |                |

**Table S4.** Standardized response rates per 100,000 inhabitants by Italian region over the phase II study period.

| <b>Region</b>         | <b>Frequency</b> | <b>Percentage</b> | <b>Italian population*</b> | <b>Response rate</b> |
|-----------------------|------------------|-------------------|----------------------------|----------------------|
| Abruzzo               | 330              | 0.8               | 1,311,580                  | 25.2                 |
| Basilicata            | 110              | 0.3               | 562,869                    | 19.5                 |
| Calabria              | 199              | 0.5               | 1,947,131                  | 10.2                 |
| Campania              | 886              | 2.1               | 5,801,692                  | 15.3                 |
| Emilia-Romagna        | 4,485            | 10.8              | 4,459,477                  | 100.6                |
| Friuli-Venezia Giulia | 812              | 2.0               | 1,215,220                  | 66.8                 |
| Lazio                 | 4,072            | 9.8               | 5,879,082                  | 69.3                 |
| Liguria               | 1494             | 3.6               | 1,550,640                  | 96.3                 |
| Lombardia             | 13,832           | 33.4              | 10,057,370                 | 137.5                |
| Marche                | 710              | 1.7               | 1,525,271                  | 46.5                 |
| Molise                | 63               | 0.2               | 305,617                    | 20.6                 |
| Piemonte              | 4,644            | 11.2              | 4,356,406                  | 106.6                |
| Puglia                | 918              | 2.2               | 4,029,053                  | 22.8                 |
| Sardegna              | 868              | 2.1               | 1,639,591                  | 52.9                 |
| Sicilia               | 722              | 1.7               | 4,999,891                  | 14.4                 |
| Toscana               | 3,188            | 7.7               | 3,729,641                  | 85.5                 |
| Trentino              | 598              | 1.4               | 1,072,276                  | 55.8                 |
| Umbria                | 312              | 0.8               | 882,015                    | 35.4                 |
| Valle d'Aosta         | 76               | 0.2               | 125,666                    | 60.5                 |
| Veneto                | 3,131            | 7.5               | 4,905,854                  | 63.8                 |

\*Resident in Italy on 1 January 2020 (ISTAT)

**Table S5.** Frequency of self-reported symptoms by sex and by positivity to NPS and/or ST between March 2020 and February 2021 (*n*=41,473)

| <b>Self-reported symptoms</b> | <b>Total<br/>(<i>n</i>=41,473)</b> | <b>Total positive cases<br/>(<i>n</i>=4,411)</b> | <b>Females<br/>(<i>n</i>=25,146)</b> | <b>Females positive cases (<i>n</i>=2,716)</b> | <b>Males<br/>(<i>n</i>=16,327)</b> | <b>Males positive cases (<i>n</i>=1,695)</b> |
|-------------------------------|------------------------------------|--------------------------------------------------|--------------------------------------|------------------------------------------------|------------------------------------|----------------------------------------------|
| Fever                         | 6,290 (15.2)                       | 2,560 (58.0)                                     | 3,755 (14.9)                         | 1,504 (55.4)                                   | 2,535 (15.5)                       | 1,056 (62.3)                                 |
| Cough                         | 6,159 (14.9)                       | 1,908 (43.3)                                     | 3,672 (14.6)                         | 1,142 (42.1)                                   | 2,487 (14.9)                       | 766 (45.2)                                   |
| Headache                      | 11,554 (27.9)                      | 2,324 (52.7)                                     | 8,027 (31.9)                         | 1,578 (58.1)                                   | 3,527 (21.6)                       | 746 (44.0)                                   |
| Myalgia                       | 9,064 (21.9)                       | 2,849 (64.6)                                     | 6,066 (24.1)                         | 1,837 (67.6)                                   | 2,998 (18.4)                       | 1,012 (59.7)                                 |
| Shortness of breath           | 3,272 (7.9)                        | 1,364 (30.9)                                     | 2,134 (8.5)                          | 893 (32.9)                                     | 1,138 (7.0)                        | 471 (27.8)                                   |
| Chest pain                    | 2,054 (5.0)                        | 731 (16.6)                                       | 1,346 (5.4)                          | 495 (18.2)                                     | 708 (4.3)                          | 236 (13.9)                                   |
| Gastrointestinal              | 7,330 (17.7)                       | 1,553 (35.2)                                     | 4,840 (19.2)                         | 1,047 (38.6)                                   | 2,490 (15.3)                       | 506 (29.9)                                   |
| Sore throat/rhinorrhoea       | 10,157 (24.5)                      | 1,927 (43.7)                                     | 6,493 (25.8)                         | 1,256 (46.2)                                   | 3,664 (22.4)                       | 671 (39.6)                                   |
| Dysgeusia                     | 3,299 (8.0)                        | 2,129 (48.3)                                     | 2,205 (8.8)                          | 1,418 (52.2)                                   | 1,094 (6.7)                        | 711 (42.0)                                   |
| Anosmia                       | 3,391 (8.2)                        | 2,275 (51.6)                                     | 2,280 (9.1)                          | 1,518 (55.9)                                   | 1,111 (6.8)                        | 757 (44.7)                                   |
| Loss of appetite              | 1,778 (4.3)                        | 932 (21.1)                                       | 1,229 (4.9)                          | 639 (23.5)                                     | 549 (3.4)                          | 293 (17.3)                                   |
| Cardiological                 | 2,732 (6.6)                        | 679 (15.4)                                       | 1,951 (7.8)                          | 499 (18.4)                                     | 781 (4.8)                          | 180 (10.6)                                   |
| Dermatological                | 2,304 (25.6)                       | 456 (10.3)                                       | 1,534 (6.1)                          | 316 (11.6)                                     | 770 (4.7)                          | 140 (8.3)                                    |
| Neurological                  | 1,747 (4.2)                        | 648 (14.7)                                       | 1,285 (5.1)                          | 490 (18.0)                                     | 462 (2.8)                          | 158 (9.3)                                    |

Number are counts and row percentages
